# Supplementary material
Source: publisher figshare collection journal article supplement (https://aacr.figshare.com/articles/dataset/_/22415720)

**Figure S1.** NCI-60 screening of DJ101 against nine cancer types.

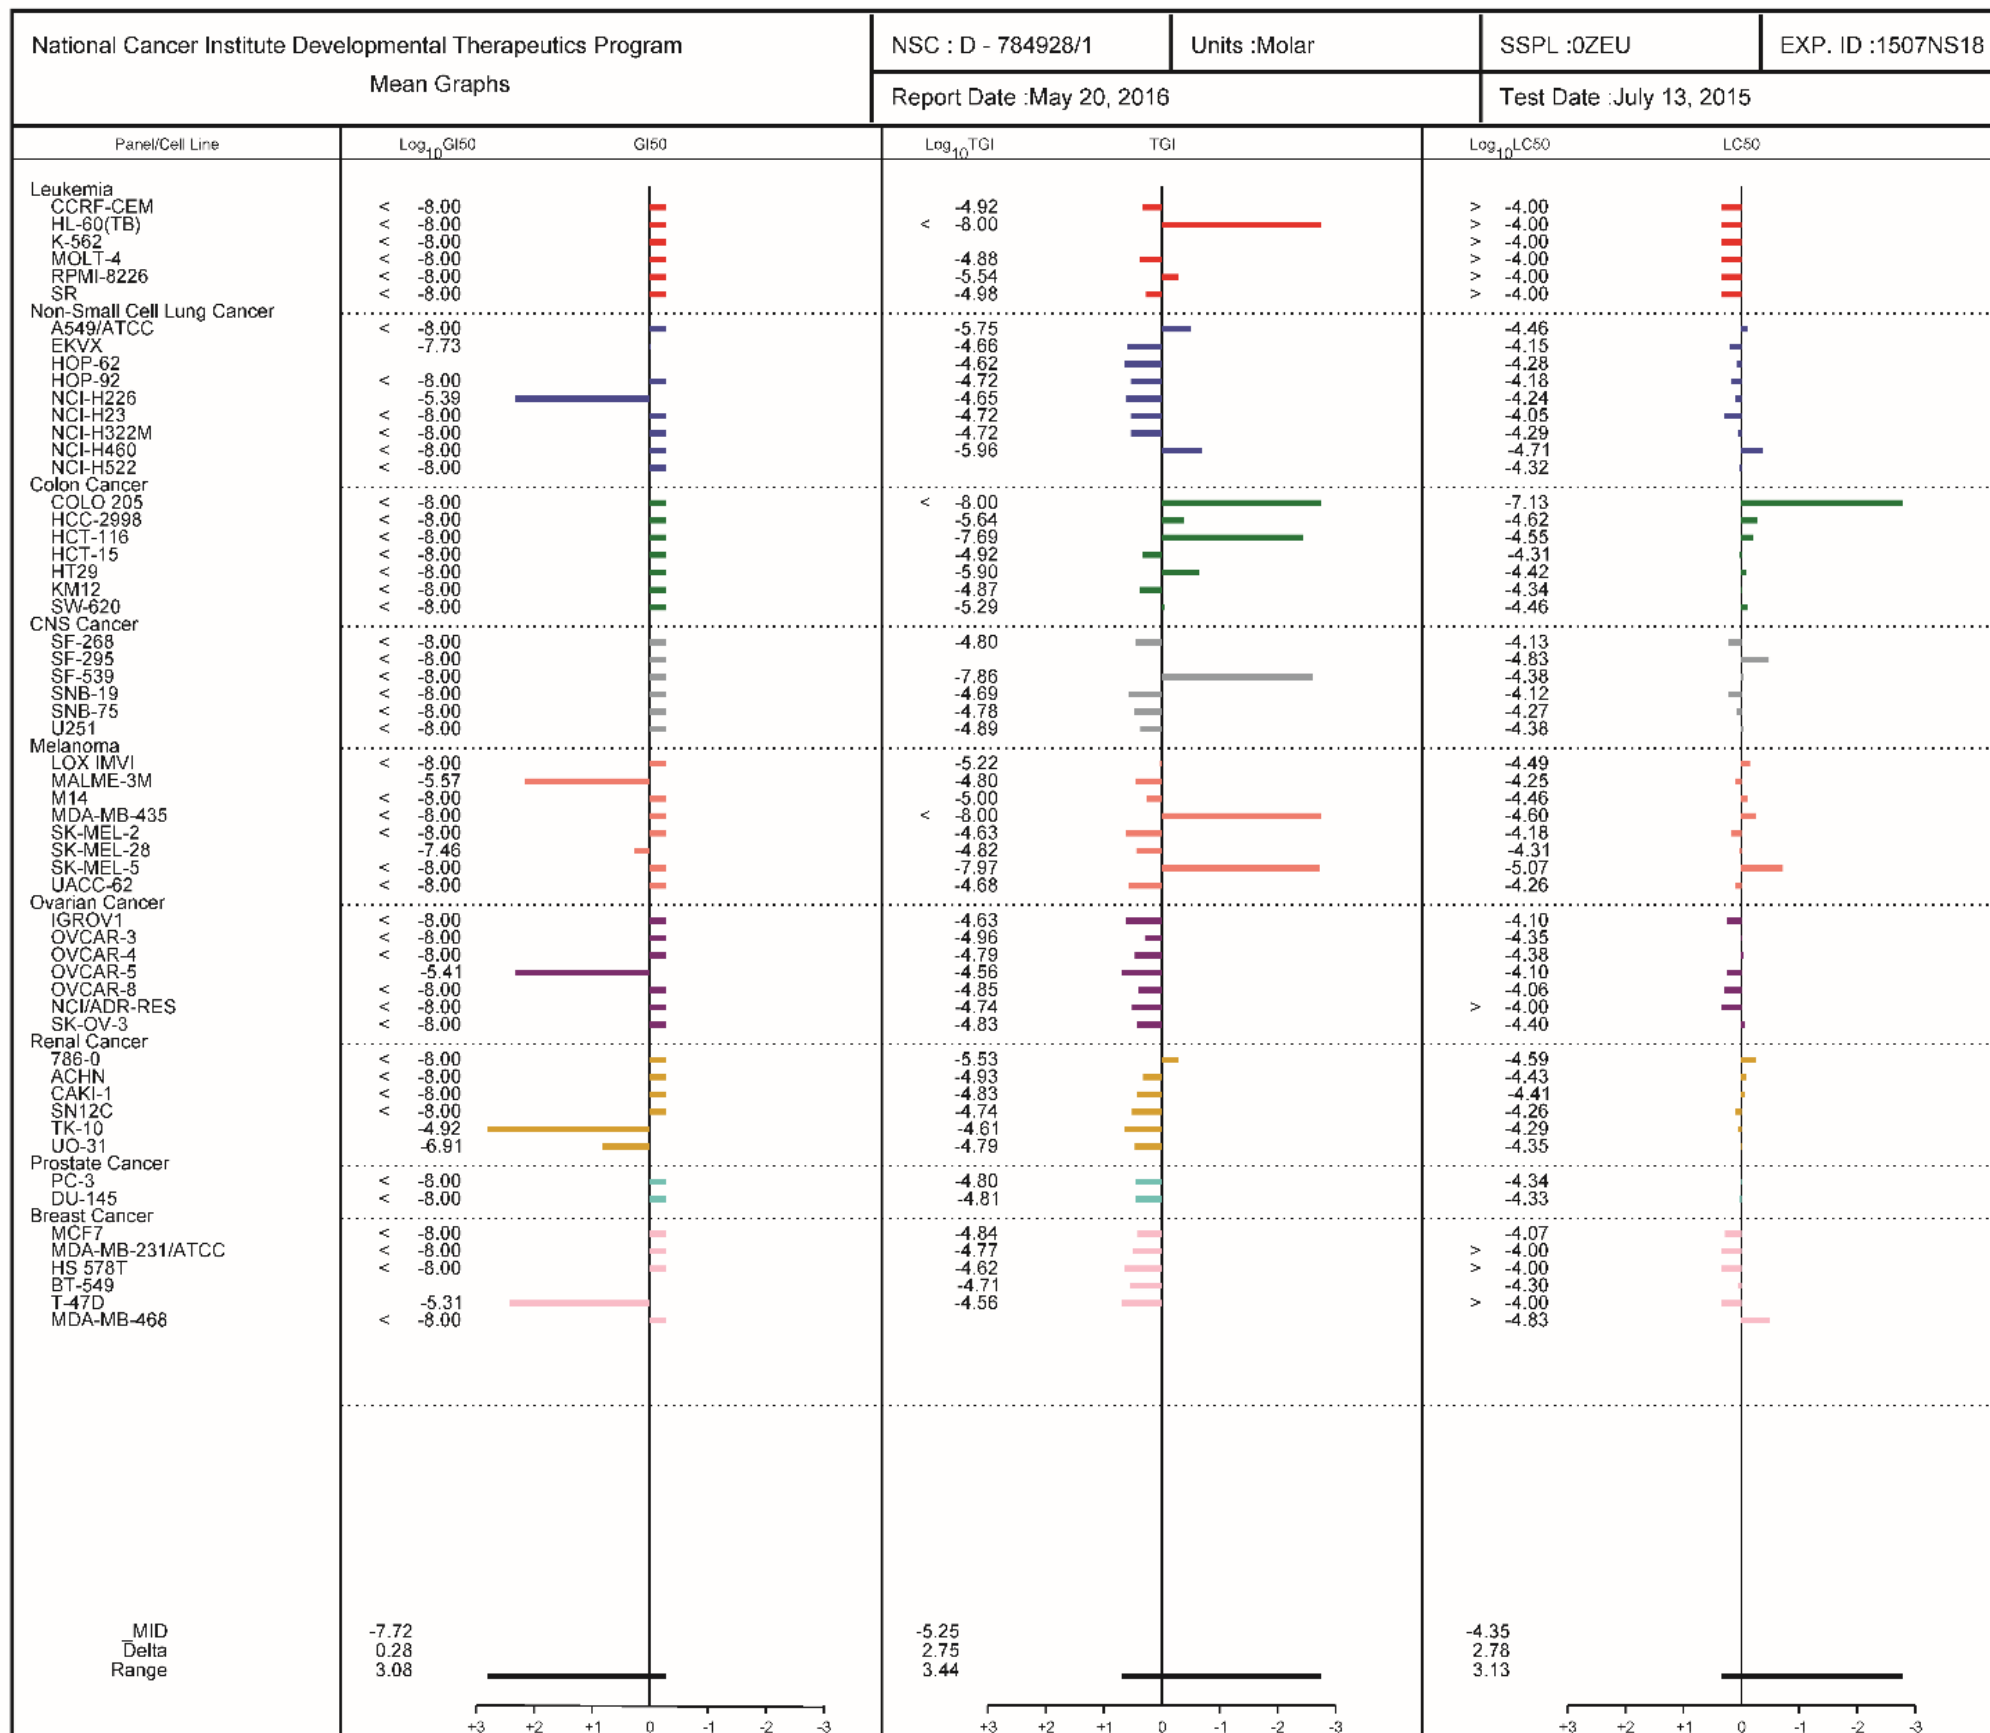

Supplement: Supplementary file 1 [file 39861773]
